# Supplementary material for: DNA vaccine based on conserved HA-peptides induces strong immune response and rapidly clears influenza virus infection from vaccinated pigs
Source: PubMed Central journal article supplement (PMC6760788; doi:10.1371/journal.pone.0222201), 2019-09-25
Supplement: pone.0222201.s003.pdf [file pone.0222201.s003.pdf]

**S1 Table.** Individual animal GEC per mL of the nasal swabs samples collected from the 1<sup>st</sup> experiment at 5 and 7 dpi. Clinical signs recorded for each of the animals are also depicted.

| Group        | Animal Id | Log <sub>10</sub> GEC/mL |              | Clinical signs                   |
|--------------|-----------|--------------------------|--------------|----------------------------------|
|              |           | 5 dpi                    | 7 dpi        |                                  |
| Unvaccinated | 1         | 3,999                    | 2,175        | Fever 6 dpi<br>Loose feces 7 dpi |
|              | 2         | 2,349                    | 2,750        |                                  |
|              | 3         | 2,370                    | 3,186        |                                  |
|              | 4         | 2,620                    | 2,571        |                                  |
|              | 5         | 2,914                    | 2,818        |                                  |
| Vaccinated   | 6         | 2,964                    | 3,090        | Fever 2 dpi                      |
|              | 7         | <b>1,240</b>             | <b>1,240</b> |                                  |
|              | 8         | 3,050                    | <b>1,240</b> |                                  |
|              | 9         | <b>1,240</b>             | 2,420        |                                  |
|              | 10        | 2,098                    | <b>1,240</b> |                                  |

*Numbers in bold type represent samples from which viral RNA was not detected (there were given the value of the detection limit of the technique).*
