# Supplementary material for: DNA vaccine based on conserved HA-peptides induces strong immune response and rapidly clears influenza virus infection from vaccinated pigs
Source: PubMed Central journal article supplement (PMC6760788; doi:10.1371/journal.pone.0222201), 2019-09-25
Supplement: pone.0222201.s004.pdf [file pone.0222201.s004.pdf]

**S2 Table.** Individual animal GEC per mL of the nasal swabs samples collected from the 2<sup>nd</sup> experiment at 5, 7, 11 and 14 dpi. Clinical signs recorded for each of the animals are also depicted.

| Group        | Anim al Id | Log <sub>10</sub> GEC/mL |              |              |              | Clinical signs                                                   |
|--------------|------------|--------------------------|--------------|--------------|--------------|------------------------------------------------------------------|
|              |            | 5 dpi                    | 7 dpi        | 11 dpi       | 14 dpi       |                                                                  |
| Unvaccinated | 1          | 2,404                    | 2,488        |              |              | Fever at 6-7 dpi /coughing at 3 dpi<br>Fever at day of challenge |
|              | 2          | 3,560                    | 2,169        |              |              |                                                                  |
|              | 3          | 5,575                    | 2,441        | <b>1,240</b> | <b>1,240</b> |                                                                  |
|              | 4          | 4,425                    | 2,654        | 2,370        | 2,627        |                                                                  |
|              | 5          | 4,125                    | 2,098        |              |              | Fever 3,4 dpi                                                    |
|              | 6          | 3,232                    | 2,880        | 2,277        | 2,528        | Fever 3-7 dpi                                                    |
| Vaccinated   | 7          | 3,631                    | 2,336        |              |              | Fever (4 dpi)/ coughing at 3 dpi                                 |
|              | 8          | 4,329                    | <b>1,240</b> | <b>1,240</b> | <b>1,240</b> | Coughing at 3 dpi                                                |
|              | 9          | 2,933                    | 2,163        |              |              |                                                                  |
|              | 10         | 3,473                    | <b>1,240</b> | <b>1,240</b> | <b>1,240</b> | Fever at 3 and 7 dpi                                             |
|              | 11         | 2,413                    | <b>1,240</b> | <b>1,240</b> | <b>1,240</b> | Fever at 2, 5 and 7 dpi/ coughing at 4 dpi                       |
|              | 12         | 2,519                    | <b>1,240</b> |              |              | Fever at 2 to 4 dpi                                              |

*Numbers in bold type represent samples from which viral RNA was not detected (there were given the value of the detection limit of the technique).*
