# Supplementary material for: DNA vaccine based on conserved HA-peptides induces strong immune response and rapidly clears influenza virus infection from vaccinated pigs
Source: PubMed Central journal article supplement (PMC6760788; doi:10.1371/journal.pone.0222201), 2019-09-25
Supplement: pone.0222201.s005.pdf [file pone.0222201.s005.pdf]

**S3 Table. Mean and mean of the standard deviation of the GEC per mL of the nasal swabs samples collected from the 1<sup>st</sup> experiment at 0, 5 and 7.**

|                   | <b>Viral shedding in nasal swabs (1<sup>st</sup> experiment)</b> |                |                                          |                |
|-------------------|------------------------------------------------------------------|----------------|------------------------------------------|----------------|
|                   | <b>Group A- Unvaccinated group</b>                               |                | <b>Group B- VC4-flagellin vaccinated</b> |                |
| <b>Time-point</b> | <b>Mean Log<sub>10</sub>GEC/mL</b>                               | <b>Mean SD</b> | <b>Mean Log<sub>10</sub>GEC/mL</b>       | <b>Mean SD</b> |
| 0                 | Negative                                                         | Negative       | Negative                                 | Negative       |
| 5                 | 2,85                                                             | 0,61           | 2,11                                     | 0,88           |
| 7                 | 2,70                                                             | 0,37           | 1,84                                     | 0,86           |
