# Supplementary material for: DNA vaccine based on conserved HA-peptides induces strong immune response and rapidly clears influenza virus infection from vaccinated pigs
Source: PubMed Central journal article supplement (PMC6760788; doi:10.1371/journal.pone.0222201), 2019-09-25
Supplement: pone.0222201.s006.pdf [file pone.0222201.s006.pdf]

**S4 Table. Mean and mean of the standard deviation of the GEC per mL of the nasal swabs samples collected from the 2<sup>nd</sup> experiment at 0, 5, 7, 11 and 14.**

|                   | <b>Viral shedding in nasal swabs (2<sup>nd</sup> study)</b> |                |                                          |                |
|-------------------|-------------------------------------------------------------|----------------|------------------------------------------|----------------|
|                   | <b>Group A- Unvaccinated group</b>                          |                | <b>Group B- VC4-flagellin vaccinated</b> |                |
| <b>Time-point</b> | <b>Mean Log<sub>10</sub>GEC/mL</b>                          | <b>Mean SD</b> | <b>Mean Log<sub>10</sub>GEC/mL</b>       | <b>Mean SD</b> |
| 0                 | Negative                                                    | Negative       | Negative                                 | Negative       |
| 5                 | 3,88                                                        | 1,089          | 3,21                                     | 0,733          |
| 7                 | 2,45                                                        | 0,29           | 1,57                                     | 0,524          |
| 11                | 1,96                                                        | 0,63           | 0                                        | 0              |
| 14                | 2,13                                                        | 0,77           | 0                                        | 0              |
