# Supplementary material for: DNA vaccine based on conserved HA-peptides induces strong immune response and rapidly clears influenza virus infection from vaccinated pigs
Source: PubMed Central journal article supplement (PMC6760788; doi:10.1371/journal.pone.0222201), 2019-09-25
Supplement: pone.0222201.s007.pdf [file pone.0222201.s007.pdf]

**S5 Table. Mean and standard deviations of OD 450 nm IgG values obtained against HA of A/California/04/09(H1N1)pdm09 from sera samples for each triplicate at 0, 20PVD, 35PVD and 7 dpi.**

| <b>Anti-rH1pdm09 OD 450nm IgG values in sera (1<sup>st</sup> experiment)</b> |             |           |                                          |           |
|------------------------------------------------------------------------------|-------------|-----------|------------------------------------------|-----------|
| <b>Group A- Unvaccinated group</b>                                           |             |           | <b>Group B- VC4-flagellin vaccinated</b> |           |
| <b>Time-point</b>                                                            | <b>Mean</b> | <b>SD</b> | <b>Mean</b>                              | <b>SD</b> |
| 0                                                                            | 0,259       | 0,117     | 0,232                                    | 0,111     |
| 20 PVD                                                                       | 0,667       | 0,284     | 0,531                                    | 0,140     |
| 35 PVD                                                                       | 0,558       | 0,344     | 1,274                                    | 0,128     |
| 7 DPI                                                                        | 1,173       | 0,105     | 1,017                                    | 0,126     |
