# Supplementary material for: DNA vaccine based on conserved HA-peptides induces strong immune response and rapidly clears influenza virus infection from vaccinated pigs
Source: PubMed Central journal article supplement (PMC6760788; doi:10.1371/journal.pone.0222201), 2019-09-25
Supplement: pone.0222201.s008.pdf [file pone.0222201.s008.pdf]

**S6 Table. Mean and standard deviation of OD 450 nm IgG values obtained against HA from A/Aichi/2/1968(H3N2) from sera samples for each triplicate at 0, 20PVD, 35PVD and 7 dpi.**

| <b>Anti-rH3 1968 OD 450nm IgG values in sera (1<sup>st</sup> experiment)</b> |             |           |                                          |           |
|------------------------------------------------------------------------------|-------------|-----------|------------------------------------------|-----------|
| <b>Group A- Unvaccinated group</b>                                           |             |           | <b>Group B- VC4-flagellin vaccinated</b> |           |
| <b>Time-point</b>                                                            | <b>Mean</b> | <b>SD</b> | <b>Mean</b>                              | <b>SD</b> |
| 0                                                                            | 0,232       | 0,116     | 0,206                                    | 0,081     |
| 20 PVD                                                                       | 0,576       | 0,239     | 0,678                                    | 0,421     |
| 35 PVD                                                                       | 0,520       | 0,068     | 0,971                                    | 0,582     |
| 7 DPI                                                                        | 0,699       | 0,064     | 1,010                                    | 0,407     |
