# Supplementary material for: DNA vaccine based on conserved HA-peptides induces strong immune response and rapidly clears influenza virus infection from vaccinated pigs
Source: PubMed Central journal article supplement (PMC6760788; doi:10.1371/journal.pone.0222201), 2019-09-25
Supplement: pone.0222201.s009.pdf [file pone.0222201.s009.pdf]

**S7 Table. Mean and standard deviation of OD 450 nm IgG values obtained against HA from A/California/04/09(H1N1)pdm09 from BALFs samples for each triplicate at 7 and 14 dpi.**

| <b>Anti-rH1pdm09 OD 450nm IgG values in BALF (2<sup>nd</sup> experiment)</b> |  |                                    |           |                                          |           |
|------------------------------------------------------------------------------|--|------------------------------------|-----------|------------------------------------------|-----------|
|                                                                              |  | <b>Group A- Unvaccinated group</b> |           | <b>Group B- VC4-flagellin vaccinated</b> |           |
| <b>Time-point</b>                                                            |  | <b>Mean</b>                        | <b>SD</b> | <b>Mean</b>                              | <b>SD</b> |
| 7 DPI                                                                        |  | 0,256                              | 0,444     | 1,093                                    | 0,573     |
| 14 DPI                                                                       |  | 0,285                              | 0,494     | 0,345                                    | 0,525     |
