# Supplementary material for: DNA vaccine based on conserved HA-peptides induces strong immune response and rapidly clears influenza virus infection from vaccinated pigs
Source: PubMed Central journal article supplement (PMC6760788; doi:10.1371/journal.pone.0222201), 2019-09-25
Supplement: pone.0222201.s010.pdf [file pone.0222201.s010.pdf]

**S8 Table. Mean and standard deviation of OD 450 nm IgG values obtained against HA from A/Aichi/2/1968(H3N2) from BALFs samples for each triplicate at 7 and 14 dpi.**

| <b>Anti-rH3 1968OD 450nm IgG values in BALF (2<sup>nd</sup> experiment)</b> |             |           |                                          |           |
|-----------------------------------------------------------------------------|-------------|-----------|------------------------------------------|-----------|
| <b>Group A- Unvaccinated group</b>                                          |             |           | <b>Group B- VC4-flagellin vaccinated</b> |           |
| <b>Time-point</b>                                                           | <b>Mean</b> | <b>SD</b> | <b>Mean</b>                              | <b>SD</b> |
| 7 DPI                                                                       | 0,351       | 0,502     | 1,231                                    | 0,552     |
| 14 DPI                                                                      | 1,031       | 0,745     | 1,698                                    | 0,520     |
