# Supplementary material for: DNA vaccine based on conserved HA-peptides induces strong immune response and rapidly clears influenza virus infection from vaccinated pigs
Source: PubMed Central journal article supplement (PMC6760788; doi:10.1371/journal.pone.0222201), 2019-09-25
Supplement: pone.0222201.s012.pdf [file pone.0222201.s012.pdf]

**S10 Table. Individual animal mean HI titer obtained against virus A/swine/Spain/003/2010 H3N2 IV from sera samples for each duplicate at 7 dpi and 14 dpi (2<sup>nd</sup> experiment).**

| <b>HI titer against SwH3N2 in sera (2<sup>nd</sup> experiment)</b> |                                                    |                                                         |               |                                                                   |                                                                    |
|--------------------------------------------------------------------|----------------------------------------------------|---------------------------------------------------------|---------------|-------------------------------------------------------------------|--------------------------------------------------------------------|
| <b>Animal</b>                                                      | <b>Group A-<br/>Unvaccinated<br/>group (7 DPI)</b> | <b>Group A-<br/>Unvaccinated<br/>group (14<br/>DPI)</b> | <b>Animal</b> | <b>Group B-<br/>VC4-<br/>flagellin<br/>vaccinated<br/>(7 DPI)</b> | <b>Group B-<br/>VC4-<br/>flagellin<br/>vaccinated<br/>(14 DPI)</b> |
| 1                                                                  | 80                                                 |                                                         | 7             | 80                                                                |                                                                    |
| 2                                                                  | 20                                                 |                                                         | 8             | 320                                                               | 640                                                                |
| 3                                                                  | 20                                                 | 40                                                      | 9             | 640                                                               |                                                                    |
| 4                                                                  | 80                                                 | 320                                                     | 10            | 80                                                                |                                                                    |
| 5                                                                  | 20                                                 |                                                         | 11            | 80                                                                | 320                                                                |
| 6                                                                  | 40                                                 | 160                                                     | 12            | 160                                                               | 640                                                                |
