# Supplementary material for: DNA vaccine based on conserved HA-peptides induces strong immune response and rapidly clears influenza virus infection from vaccinated pigs
Source: PLoS One. 2019 Sep 25;14(9):e0222201. doi: 10.1371/journal.pone.0222201 (PMC6760788; doi:10.1371/journal.pone.0222201)
Supplement: S9 Table — (PDF) [file pone.0222201.s011.pdf]

**S9 Table. Individual animal mean HI titer obtained against virus A/Catalonia/63/2009 H1N1 IV from sera samples for each duplicate at 35 PVD and 7 dpi (1<sup>st</sup> experiment).**

| <b>HI titer against pH1N1 in sera (1<sup>st</sup> experiment)</b> |                                                         |                                                    |               |                                                                    |                                                                   |
|-------------------------------------------------------------------|---------------------------------------------------------|----------------------------------------------------|---------------|--------------------------------------------------------------------|-------------------------------------------------------------------|
| <b>Animal</b>                                                     | <b>Group A-<br/>Unvaccinated<br/>group<br/>(35 PVD)</b> | <b>Group A-<br/>Unvaccinated<br/>group (7 DPI)</b> | <b>Animal</b> | <b>Group B-<br/>VC4-<br/>flagellin<br/>vaccinated<br/>(35 PVD)</b> | <b>Group B-<br/>VC4-<br/>flagellin<br/>vaccinated<br/>(7 DPI)</b> |
| 1                                                                 | 0                                                       | 40                                                 | 6             | 80                                                                 | 160                                                               |
| 2                                                                 | 80                                                      | 160                                                | 7             | 0                                                                  | 40                                                                |
| 3                                                                 | 0                                                       | 0                                                  | 8             | 0                                                                  | 40                                                                |
| 4                                                                 | 0                                                       | 0                                                  | 9             | 0                                                                  | 40                                                                |
| 5                                                                 | 0                                                       | 20                                                 | 10            | 80                                                                 | 80                                                                |
